# Supplementary material
Source: PubMed Central journal article supplement (PMC2754889)

Duncan et al., Supplemental Figure S1

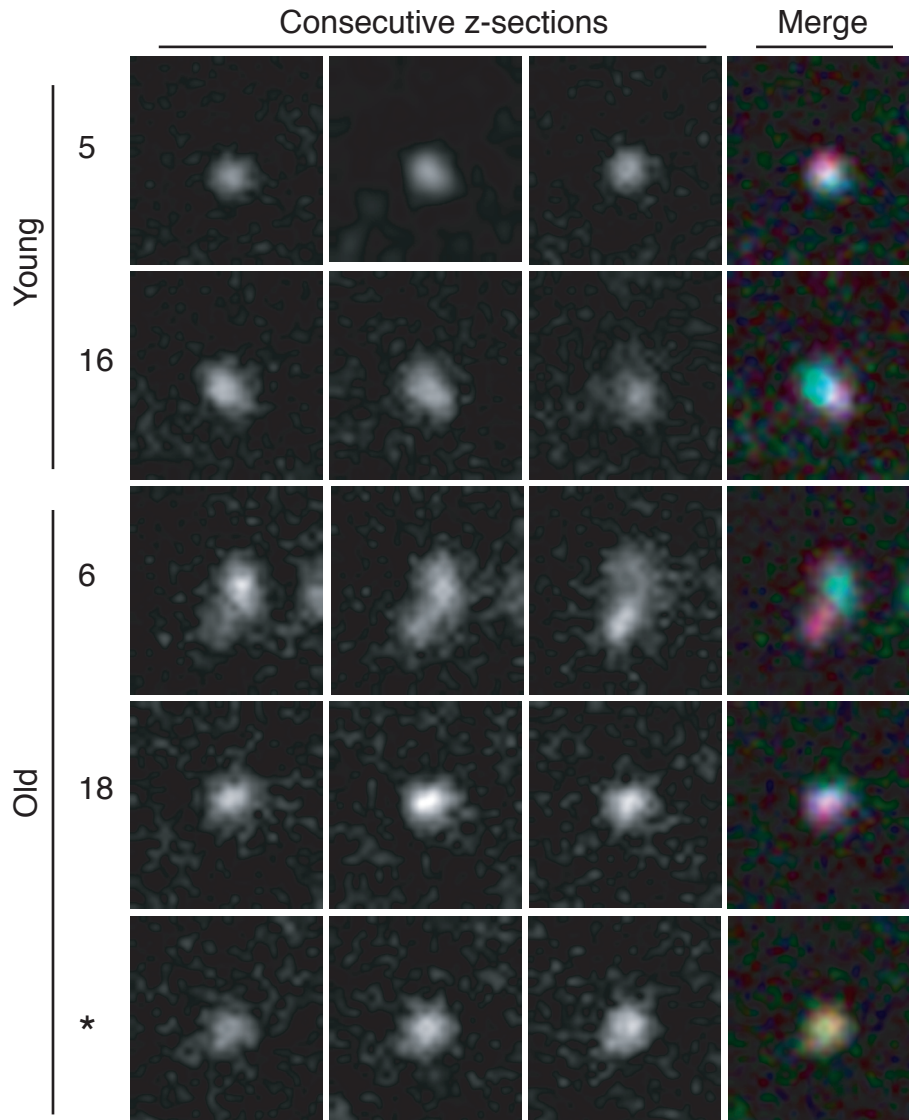

Supplement: supp_109.077909_biolreprod.109.077909-1.pdf [file supp_109.077909_biolreprod.109.077909-1.pdf]
